# Supplementary material
Source: MDPI journal article supplement (https://www.mdpi.com/2073-4441/16/9/1241)
Supplement: s1 [file s1]

## SUPPLEMENTARY MATERIAL

**Table S1.** Detected volatile organic compounds (VOCs) and concentrations, measured by the Purge-and-Trap-gas chromatography-mass spectrometer (PT-GC-MS) equipment of the chlorinated-solvent-polluted aquifer, in Besòs groundwater (GW). Transport blank (TB), field blank (FB), and monitoring well (MW). Limits of detection (LOD) and quantification (LOQ) of VOCs analysed by PT-GC-MS and headspace solid-phase microextraction gas chromatography electron capture detector (SPME-GC-ECD). All values are expressed in µg/L.

| #  | Compound                    | PT-GC-MS |      |      |      |              |                | PT-GC-MS |       | SPME-GC-ECD |       |
|----|-----------------------------|----------|------|------|------|--------------|----------------|----------|-------|-------------|-------|
|    |                             | TB       | FB   | Well | MW_2 | MW_6         | MW_14          | LOD      | LOQ   | LOD         | LOQ   |
| 1  | Dichlorodifluoromethane     | <LOD     | <LOD | <LOD | <LOD | <LOD         | <LOD           | 0.026    | 0.088 | -           | -     |
| 2  | Chloromethane               | <LOD     | <LOD | <LOD | <LOD | <b>1.354</b> | <LOD           | 0.053    | 0.177 | -           | -     |
| 3  | Vinyl chloride              | <LOD     | <LOD | <LOD | <LOD | <LOD         | <LOD           | 0.038    | 0.125 | -           | -     |
| 4  | Bromomethane                | <LOD     | <LOD | <LOD | <LOD | <LOD         | <LOD           | 0.174    | 0.580 | -           | -     |
| 5  | Chloroethane                | <LOD     | <LOD | <LOD | <LOD | <LOD         | <LOD           | 0.261    | 0.870 | -           | -     |
| 6  | Trichlorofluoromethane      | <LOD     | <LOD | <LOD | <LOD | <LOD         | <LOD           | 0.046    | 0.155 | -           | -     |
| 7  | 1,1-dichloroethylene        | <LOD     | <LOD | <LOD | <LOD | <LOD         | <LOD           | 0.044    | 0.148 | -           | -     |
| 8  | Methylene chloride          | <LOD     | <LOD | <LOD | <LOD | <LOD         | <LOD           | 1.911    | 6.371 | -           | -     |
| 9  | Trans-1,2-dichloroethylene  | <LOD     | <LOD | <LOD | <LOD | <LOD         | <LOD           | 0.055    | 0.182 | -           | -     |
| 10 | 1,1-dichloroethane          | <LOD     | <LOD | <LOD | <LOD | <LOD         | <LOD           | 0.015    | 0.049 | -           | -     |
| 11 | 2,2-dichloropropane         | <LOD     | <LOD | <LOD | <LOD | <LOD         | <LOD           | 0.006    | 0.021 | -           | -     |
| 12 | Cis-1,2-dichloroethylene    | <LOD     | <LOD | <LOD | <LOD | <b>0.450</b> | <b>0.844</b>   | 0.012    | 0.041 | 0.039       | 0.130 |
| 13 | Bromochloromethane          | <LOD     | <LOD | <LOD | <LOD | <LOD         | <LOD           | 0.011    | 0.038 | -           | -     |
| 14 | Chloroform                  | <LOD     | <LOD | <LOD | <LOD | <LOD         | <b>&lt;LOQ</b> | 0.090    | 0.300 | -           | -     |
| 15 | 1,1,1-trichloroethane       | <LOD     | <LOD | <LOD | <LOD | <LOD         | <LOD           | 0.006    | 0.020 | -           | -     |
| 16 | Carbon tetrachloride        | <LOD     | <LOD | <LOD | <LOD | <LOD         | <LOD           | 0.017    | 0.057 | -           | -     |
| 17 | 1,1-dichloropropylene       | <LOD     | <LOD | <LOD | <LOD | <LOD         | <LOD           | 0.021    | 0.069 | -           | -     |
| 18 | Benzene                     | <LOD     | <LOD | <LOD | <LOD | <b>0.665</b> | <LOD           | 0.011    | 0.036 | -           | -     |
| 19 | 1,2-dichloroethane          | <LOD     | <LOD | <LOD | <LOD | <LOD         | <LOD           | 0.030    | 0.099 | -           | -     |
| 20 | Trichloroethylene           | <LOD     | <LOD | <LOD | <LOD | <b>2.864</b> | <b>7.808</b>   | 0.020    | 0.065 | 0.003       | 0.010 |
| 21 | 1,2-dichloropropane         | <LOD     | <LOD | <LOD | <LOD | <LOD         | <LOD           | 0.015    | 0.049 | -           | -     |
| 22 | Dibromomethane              | <LOD     | <LOD | <LOD | <LOD | <LOD         | <LOD           | 0.007    | 0.022 | -           | -     |
| 23 | Bromodichloromethane        | <LOD     | <LOD | <LOD | <LOD | <LOD         | <LOD           | 0.004    | 0.012 | -           | -     |
| 24 | Cis-1,3-dichloropropylene   | <LOD     | <LOD | <LOD | <LOD | <LOD         | <LOD           | 0.007    | 0.023 | -           | -     |
| 25 | Toluene                     | <LOD     | <LOD | <LOD | <LOD | <b>1.959</b> | <b>0.202</b>   | 0.059    | 0.196 | -           | -     |
| 26 | Trans-1,3-dichloropropylene | <LOD     | <LOD | <LOD | <LOD | <LOD         | <LOD           | 0.008    | 0.027 | -           | -     |
| 27 | 1,1,2-trichloroethane       | <LOD     | <LOD | <LOD | <LOD | <LOD         | <LOD           | 0.006    | 0.019 | -           | -     |
| 28 | Tetrachloroethylene         | <LOD     | <LOD | <LOD | <LOD | <b>0.283</b> | <b>6.332</b>   | 0.046    | 0.153 | 0.024       | 0.080 |
| 29 | 1,3-dichloropropane         | <LOD     | <LOD | <LOD | <LOD | <LOD         | <LOD           | 0.003    | 0.009 | -           | -     |
| 30 | Dibromochloromethane        | <LOD     | <LOD | <LOD | <LOD | <LOD         | <LOD           | 0.023    | 0.076 | -           | -     |
| 31 | 1,2-dibromoethane           | <LOD     | <LOD | <LOD | <LOD | <LOD         | <LOD           | 0.011    | 0.035 | -           | -     |
| 32 | Chlorobenzene               | <LOD     | <LOD | <LOD | <LOD | <LOD         | <LOD           | 0.006    | 0.021 | -           | -     |
| 33 | 1,1,1,2-tetrachloroethane   | <LOD     | <LOD | <LOD | <LOD | <LOD         | <LOD           | 0.002    | 0.005 | -           | -     |
| 34 | Ethylbenzene                | <LOD     | <LOD | <LOD | <LOD | <b>0.874</b> | <LOD           | 0.004    | 0.014 | -           | -     |

|    |                             |      |      |      |              |              |      |       |       |   |   |
|----|-----------------------------|------|------|------|--------------|--------------|------|-------|-------|---|---|
| 35 | M-xylene/p-xylene           | <LOD | <LOD | <LOD | <LOD         | <b>0.669</b> | <LOD | 0.004 | 0.012 | - | - |
| 36 | O-xylene                    | <LOD | <LOD | <LOD | <LOD         | <b>1.483</b> | <LOD | 0.003 | 0.010 | - | - |
| 37 | Styrene                     | <LOD | <LOD | <LOD | <LOD         | <LOD         | <LOD | 0.003 | 0.008 | - | - |
| 38 | Bromoform                   | <LOD | <LOD | <LOD | <LOD         | <LOD         | <LOD | 0.024 | 0.081 | - | - |
| 39 | Isopropylbenzene            | <LOD | <LOD | <LOD | <LOD         | <LOD         | <LOD | 0.003 | 0.009 | - | - |
| 40 | Bromobenzene                | <LOD | <LOD | <LOD | <LOD         | <LOD         | <LOD | 0.004 | 0.012 | - | - |
| 41 | 1,1,2,2-tetrachloroethane   | <LOD | <LOD | <LOD | <LOD         | <LOD         | <LOD | 0.004 | 0.014 | - | - |
| 42 | 1,2,3-trichloropropane      | <LOD | <LOD | <LOD | <LOD         | <LOD         | <LOD | 0.003 | 0.009 | - | - |
| 43 | N-propylbenzene             | <LOD | <LOD | <LOD | <LOD         | <LOD         | <LOD | 0.005 | 0.018 | - | - |
| 44 | 2-chlorotoluene             | <LOD | <LOD | <LOD | <LOD         | <LOD         | <LOD | 0.004 | 0.012 | - | - |
| 45 | 1,3,5-trimethylbenzene      | <LOD | <LOD | <LOD | <LOD         | <b>0.312</b> | <LOD | 0.004 | 0.015 | - | - |
| 46 | 4-chlorotoluene             | <LOD | <LOD | <LOD | <LOD         | <LOD         | <LOD | 0.005 | 0.018 | - | - |
| 47 | Tert-butylbenzene           | <LOD | <LOD | <LOD | <LOD         | <LOD         | <LOD | 0.003 | 0.011 | - | - |
| 48 | 1,2,4-trimethylbenzene      | <LOD | <LOD | <LOD | <LOD         | <b>0.601</b> | <LOD | 0.004 | 0.013 | - | - |
| 49 | Sec-butylbenzene            | <LOD | <LOD | <LOD | <LOD         | <LOD         | <LOD | 0.006 | 0.021 | - | - |
| 50 | 1,3-dichlorobenzene         | <LOD | <LOD | <LOD | <LOD         | <LOD         | <LOD | 0.006 | 0.021 | - | - |
| 51 | 4-isopropyltoluene          | <LOD | <LOD | <LOD | <LOD         | <LOD         | <LOD | 0.006 | 0.020 | - | - |
| 52 | 1,4-dichlorobenzene         | <LOD | <LOD | <LOD | <LOD         | <LOD         | <LOD | 0.007 | 0.024 | - | - |
| 53 | N-butylbenzene              | <LOD | <LOD | <LOD | <LOD         | <LOD         | <LOD | 0.011 | 0.038 | - | - |
| 54 | 1,2-dichlorobenzene         | <LOD | <LOD | <LOD | <b>0.275</b> | <LOD         | <LOD | 0.003 | 0.010 | - | - |
| 55 | 1,2-dibromo-3-chloropropane | <LOD | <LOD | <LOD | <LOD         | <LOD         | <LOD | 0.049 | 0.164 | - | - |
| 56 | 1,2,4-trichlorobenzene      | <LOD | <LOD | <LOD | <LOD         | <LOD         | <LOD | 0.013 | 0.042 | - | - |
| 57 | Hexachlorobutadiene         | <LOD | <LOD | <LOD | <LOD         | <LOD         | <LOD | 0.035 | 0.115 | - | - |
| 58 | Naphthalene                 | <LOD | <LOD | <LOD | <LOD         | <b>0.257</b> | <LOD | 0.011 | 0.037 | - | - |
| 59 | 1,2,3-trichlorobenzene      | <LOD | <LOD | <LOD | <LOD         | <LOD         | <LOD | 0.014 | 0.047 | - | - |

**Table S2.** Physico-chemical characterization of the chlorinated-solvent-polluted aquifer in the GW. All values are expressed in mg/L.

| Samples | Ca <sup>2+</sup> | Mg <sup>2+</sup> | K <sup>+</sup> | Na <sup>+</sup> | Br <sup>-</sup> | Cl <sup>-</sup> | PO <sub>4</sub> <sup>3-</sup> | NO <sub>3</sub> <sup>-</sup> | SO <sub>4</sub> <sup>2-</sup> | HCO <sub>3</sub> <sup>-</sup> |
|---------|------------------|------------------|----------------|-----------------|-----------------|-----------------|-------------------------------|------------------------------|-------------------------------|-------------------------------|
| TB      | <0.5             | <0.3             | <0.1           | <0.1            | <0.1            | <0.3            | <0.1                          | <0.5                         | <0.4                          | -                             |
| FB      | <0.5             | <0.3             | <0.1           | <0.1            | <0.1            | <0.3            | <0.1                          | <0.5                         | <0.4                          | -                             |
| Well    | 44               | 2                | 19             | 11              | <0.1            | 72              | <0.1                          | 0.6                          | 5.1                           | 71                            |
| MW-2    | 104              | 20               | 14             | 139             | <0.2            | 212             | <0.2                          | 0.8                          | 109                           | 209                           |
| MW-6    | 5820             | 521              | 41             | 244             | <20             | 24600           | <20                           | 216                          | 81                            | -                             |
| MW-14   | 1990             | 175              | 12             | 186             | <2.0            | 5410            | <2.0                          | 259                          | 128                           | -                             |

**Table S3.** GW metals' occurrence in the chlorinated-solvent-polluted aquifer. All values are expressed in µg/L.

| Samples | Cd   | Co   | Pb   | Zn   | Fe  | Ni   | V     | Cu   | Ba  | Mn   | As   |
|---------|------|------|------|------|-----|------|-------|------|-----|------|------|
| TB      | <0.5 | <0.5 | <2.5 | <25  | <25 | <2.5 | <0.25 | <2.5 | <1  | <1   | <0.5 |
| FB      | <0.5 | <0.5 | <2.5 | <25  | <25 | <2.5 | <0.25 | <2.5 | <1  | <1   | <0.5 |
| Well    | <1   | 2    | <5   | 1970 | <50 | <5   | <0.5  | <5   | 432 | 3510 | <1   |

|              |     |     |    |         |         |      |      |      |      |        |     |
|--------------|-----|-----|----|---------|---------|------|------|------|------|--------|-----|
| <b>MW-2</b>  | <1  | 5   | <5 | 110     | 360     | 8    | <0.5 | <5   | 550  | 4420   | 7   |
| <b>MW-6</b>  | 302 | 990 | 83 | 3091000 | 1842000 | 6930 | <5   | 3050 | 1830 | 116000 | <10 |
| <b>MW-14</b> | 42  | 226 | 24 | 267000  | 3950    | 782  | <5   | 170  | 498  | 34400  | <10 |

**Table S4.** Concentration ( $\mu\text{g/L}$ ) of chlorinated solvents in unspiked and spiked ( $10 \mu\text{g/L}$ ) real GW samples at 0 and 5 h of incubation time, detected by SPME-GC-ECD, and their removal rates (%). No removal (N.R.) quantified since DCE was undetected in unspiked GW at 0 or 5 h.

|            | Concentration ( $\mu\text{g/L}$ ) |                 |                   |                   | Removal (%)     |                   |
|------------|-----------------------------------|-----------------|-------------------|-------------------|-----------------|-------------------|
|            | Spiked GW<br>0h                   | Spiked GW<br>5h | Unspiked GW<br>0h | Unspiked GW<br>5h | Spiked GW<br>5h | Unspiked GW<br>5h |
| <b>DCE</b> | $3.6 \pm 0.3$                     | $1.8 \pm 0.5$   | < LOD             | < LOD             | $49.9 \pm 3.5$  | N.R.              |
| <b>TCE</b> | $14.7 \pm 0.3$                    | < LOD           | $5.2 \pm 1$       | $0.3 \pm 0.1$     | $99.8 \pm 0.2$  | $93.9 \pm 6.4$    |
| <b>PCE</b> | $12.7 \pm 0.9$                    | $5.3 \pm 0.2$   | $5.9 \pm 0.9$     | $1.6 \pm 0.3$     | $58.3 \pm 1.3$  | $72.9 \pm 6.3$    |

**Table S5.** Log Octanol-Water Partition Coefficient ( $\text{Log } K_{\text{ow}}$ ) of studied compounds.

| Compounds                       | $\text{Log } K_{\text{ow}}$ | Ref  |
|---------------------------------|-----------------------------|------|
| <b>Cis-1,2-dichloroethylene</b> | 1.86                        | [30] |
| <b>Tetrachloroethylene</b>      | 3.40                        | [30] |
| <b>Trichloroethylene</b>        | 2.29                        | [30] |

**Table S6.** Literature review of chemical reagents and their reported removal yield with chlorinated solvents. Persulfate (PS), nano zero-valent iron (nZVI), cis-1,2-dichloroethylene (DCE), trichloroethylene (TCE), and tetrachloroethylene (PCE).

| Treatment   | Monitored molecules | Reported removal                                                                                                                          | Type of experiment                                                                               | pH                          | Temperature     | Type of water                                                                                                           | Reference |
|-------------|---------------------|-------------------------------------------------------------------------------------------------------------------------------------------|--------------------------------------------------------------------------------------------------|-----------------------------|-----------------|-------------------------------------------------------------------------------------------------------------------------|-----------|
| PS          | TCE                 | < 30% removal.                                                                                                                            | Batch experiments in 40 mL septum sealed vials, duration: 16 h.                                  | Final pH 6.2                | 20 °C           | Synthetic water spiked with 50 or 375 mg/L TCE and a molar ratio of TCE: PS of 1:20.                                    | [34]      |
| Fe(VI)      | TCE                 | Maximum removal with ultrapure water at pH 7: 97%.<br>Maximum removal with real water at pH 7 (containing dissolved organic carbon): 42%. | Batch experiments with 10 mL containing solution in 20 mL septum sealed vials, duration: 30 min. | Initial pH 3, 5, 7, 9 or 11 | Not reported    | Ultrapure water or real GW spiked with 0.1-10 mg/L of TCE and with Fe(VI) at 50 mg/L.                                   | [8]       |
| nZVI        | TCE, PCE and DCE    | Removal generally >80% for each of these molecules depending on the pilot test and on the type of employed nZVI.                          | Full-scale experiments.                                                                          | Real conditions             | Real conditions | Unspiked real water.                                                                                                    | [22]      |
| PS+Fe(II)   | TCE                 | Nearly 100% removal.                                                                                                                      | Batch experiments in 60 mL glass reactors, duration: 1 h.                                        | Final pH around 3           | 20 °C           | Synthetic water spiked with 60 mg/L TCE and a molar ratio of PS:Chelate:Fe(II):TCE molar ratio of 20:2:10:1.            | [33]      |
|             | PCE                 | Complete removal.                                                                                                                         | Batch experiments in 250 mL glass reactors, duration: 30 min.                                    | Initial pH of 3             | 20 °C           | Synthetic water spiked with 0.015 mmol/L PCE and a molar ratio of PS:Fe(II):Hydroxylamine:PCE molar ratio of 30:4:20:1. | [43]      |
| PS+nZVI     | TCE                 | > 95% removal.                                                                                                                            | Batch experiments in 40 mL septum sealed vials, duration: 16 h.                                  | Final pH 2.6                | 20 °C           | Synthetic water spiked with 50 or 375 mg/L TCE and a molar ratio of TCE: PS: nZVI of 1:20:150.                          | [34]      |
| PS + S-nZVI | DCE, TCE and PCE    | 93 – 133 %                                                                                                                                | Batch experiments in 70 mL glass reactors, duration: 0.9 - 300 h                                 | Not reported                | Not reported    | S-nZVI (Fe content: 81.6 %; S/Fe molar ratio: 99.95:0.05) concentration: 1.36 – 33.9 mmol/g                             | [26]      |
|             | TCE                 | 97-99 % removal                                                                                                                           | Batch experiments in 250 mL glass reactors, duration: 60 min                                     | 3, 5, 7, 9, 11              | Not reported    | Synthetic groundwater with PS: 4 mM; S-nZVI: 250 mg/L TCE: 1.5 mM                                                       | [35]      |

**Table S7.** Human health (hazard quotient (HQ), cancer risk (CR)) and environmental (risk quotient (RQ)) risk assessment parameters obtained necessary for calculations. \* According to the Agency for Toxic Substances and Disease Registry, there is inadequate information to assess the carcinogenic potential of cis-1,2-dichloroethylene (DCE).

|               |                 |         | DCE     | TCE     | PCE     |
|---------------|-----------------|---------|---------|---------|---------|
| Human health  | Non-cancer risk | RfD     | 2.0E-03 | 5.0E-04 | 6.0E-03 |
|               | Cancer risk     | CSF     | *       | 4.6E-02 | 2.1E-03 |
| Environmental |                 | PNEC Fw | 6.8     | 10.0    | 10.0    |
